# Supplementary material for: A near infrared dye-coated silver nanoparticle/carbon dot nanocomposite for targeted tumor imaging and enhanced photodynamic therapy
Source: PubMed Central journal article supplement — Nanoscale Adv. 2019 Dec 11;2(1):489–94. doi: 10.1039/c9na00596j (PMC9418805; doi:10.1039/c9na00596j), 2019-12-11
Supplement: NA-002-C9NA00596J-s001.pdf [file NA-002-C9NA00596J-s001.pdf]

## Supporting Information

### Near infrared dye-coated silver nanoparticle/carbon dot nanocomposite for targeted tumor imaging and enhanced photodynamic therapy

Rongjun Liu,<sup>a,b</sup> Zhengmin Yang,<sup>a</sup> Liangliang Zhang,<sup>\*,a</sup> Jingjin Zhao,<sup>a</sup> Cheng Hou<sup>a</sup> and Shulin

Zhao<sup>\*,a</sup>

<sup>a</sup> State Key Laboratory for the Chemistry and Molecular Engineering of Medicinal Resources,

Guangxi Normal University, Guilin, 541004, China

<sup>b</sup> Guangxi Key Laboratory of Agricultural Resources Chemistry and Biotechnology, College of

Chemistry and Food Science, Yulin Normal University, Yulin, 537000, China

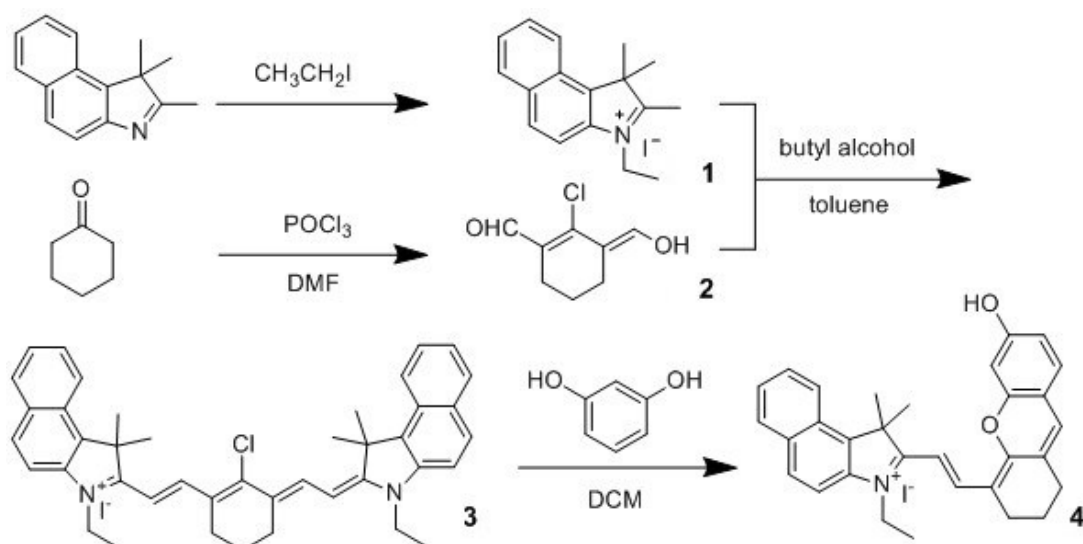

**Scheme S1.** Synthetic routine of CyOH.

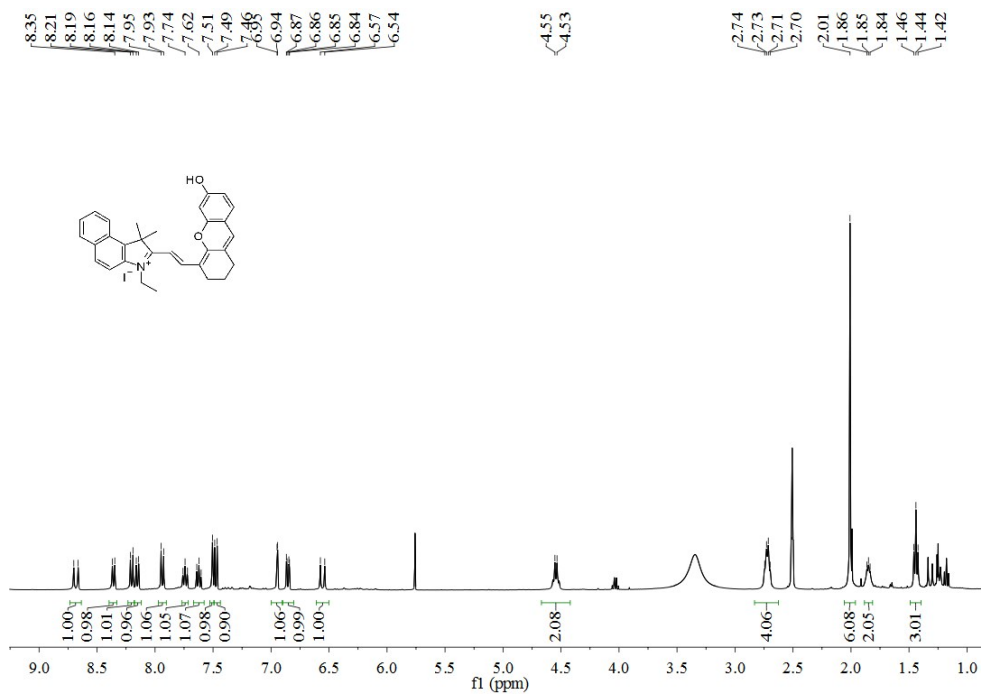

Figure S1. <sup>1</sup>H NMR spectrum of CyOH in DMSO.

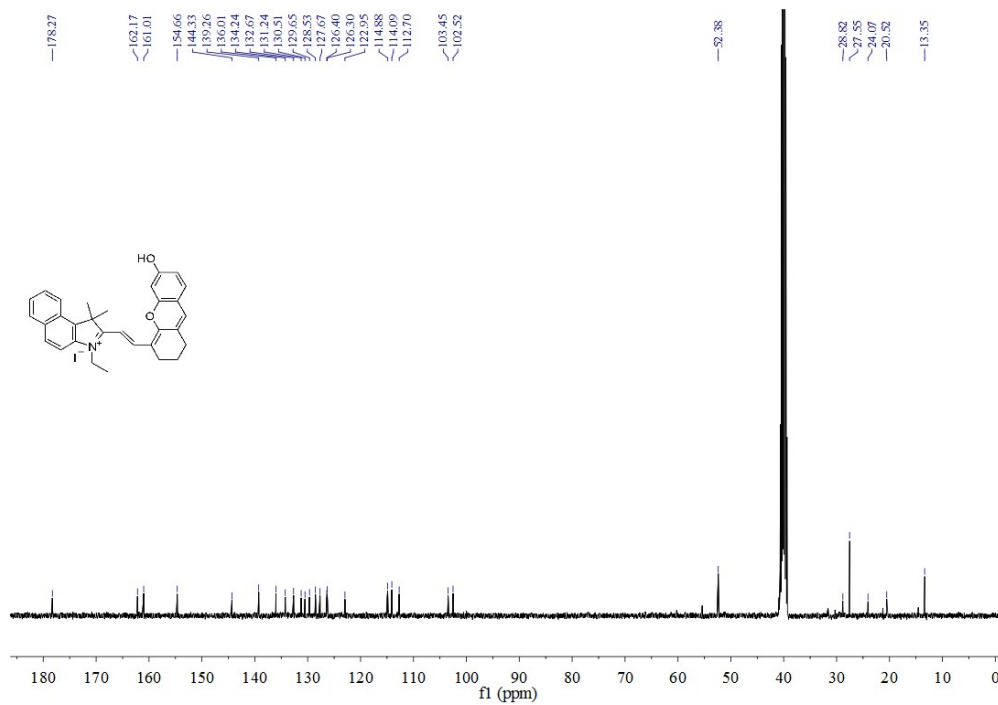

Figure S2. <sup>13</sup>C NMR spectrum of CyOH in DMSO.

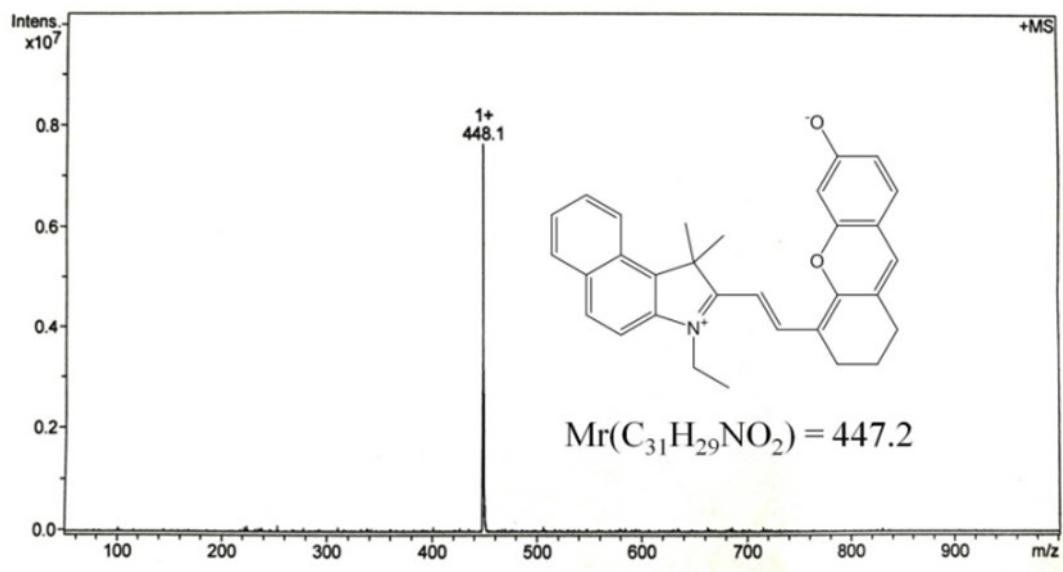

**Figure S3.** MS spectrum of CyOH.

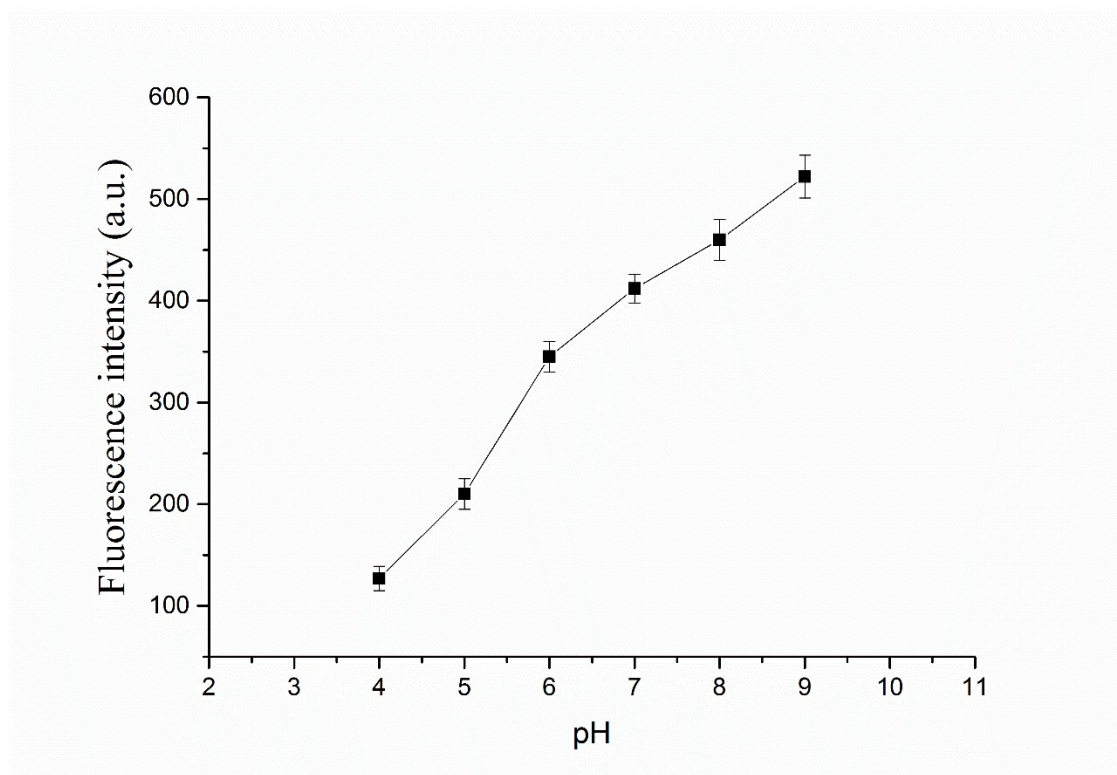

**Figure S4.** The fluorescence intensity of CyOH–AgNP/CD ( $\lambda_{ex} = 633$  nm) in ethanol/Tris-HCl buffer solution (1:1 v/v) in the range of pH values from 3 to 9.

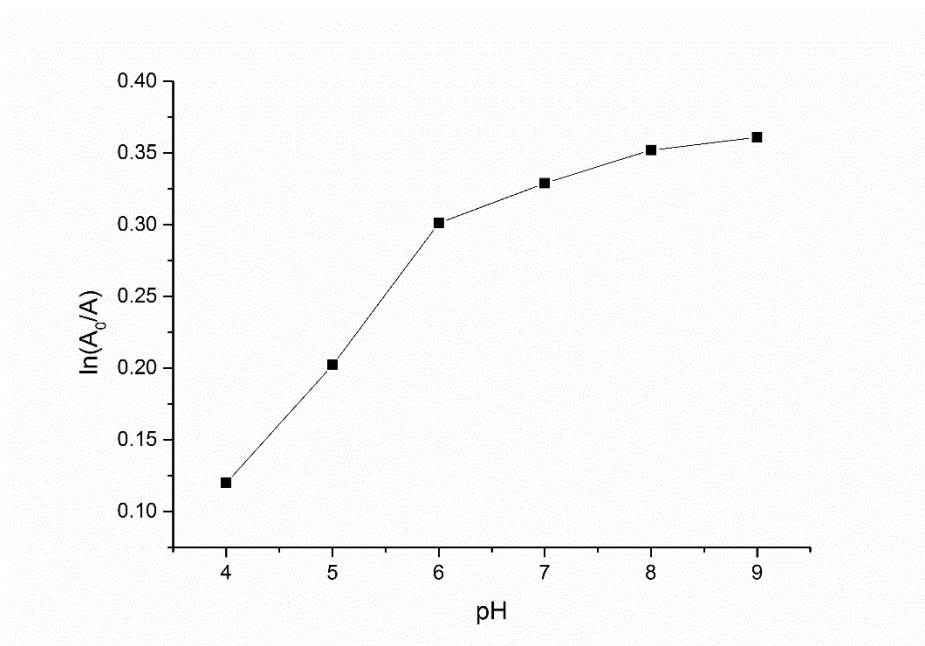

**Figure S5.** The decomposition rate of DPBF by CyOH–AgNP/CD in the range of pH values from 3 to 10 (660 nm laser for 2 min).

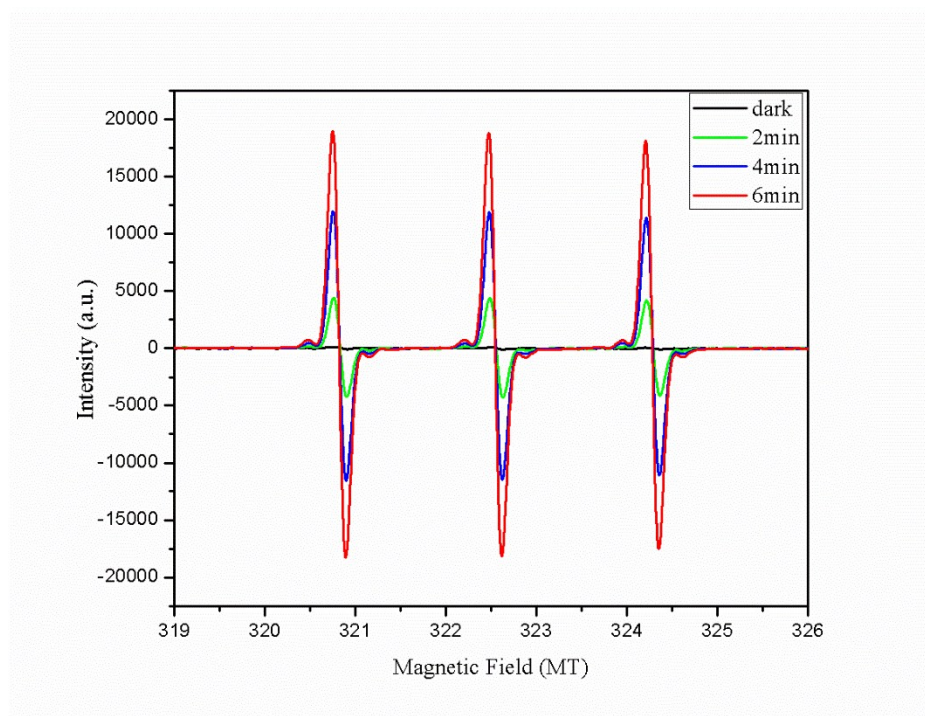

**Figure S6.** The EPR spectra of  $^1\text{O}_2$  produced in the presence of CyOH–AgNP/CD by after irradiation with a 660 nm laser.

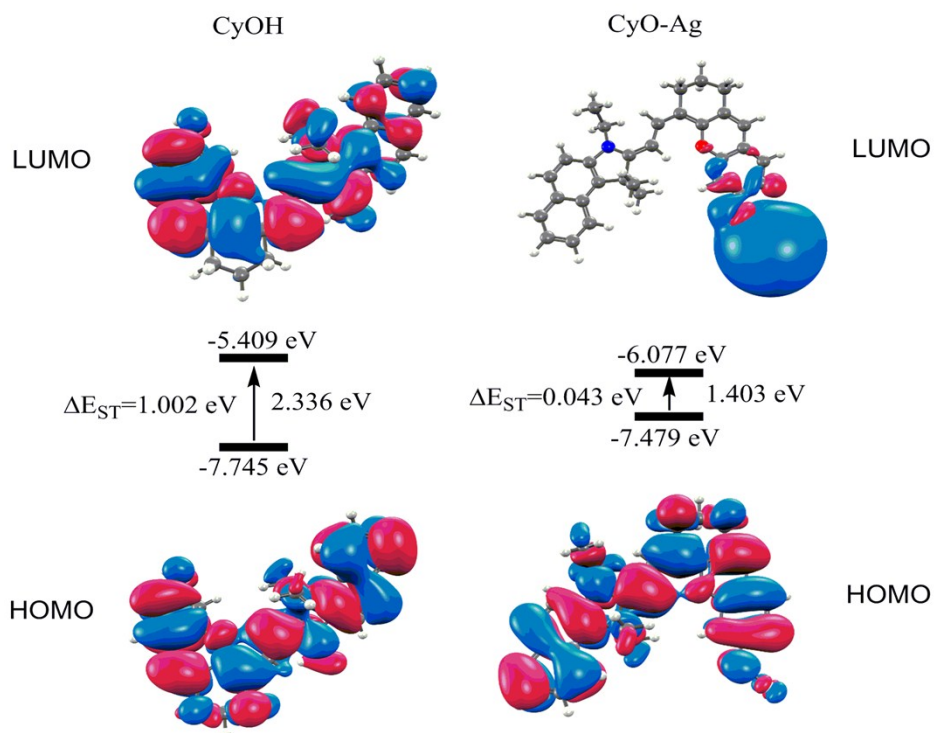

**Figure S7.** Frontier molecular orbital distribution, energy gaps ( $\Delta E_{ST}$ ) between S1 and T1 for ligand (left) and  $\text{Ag}^+$ -ligand (right) calculated by TD-DFT.

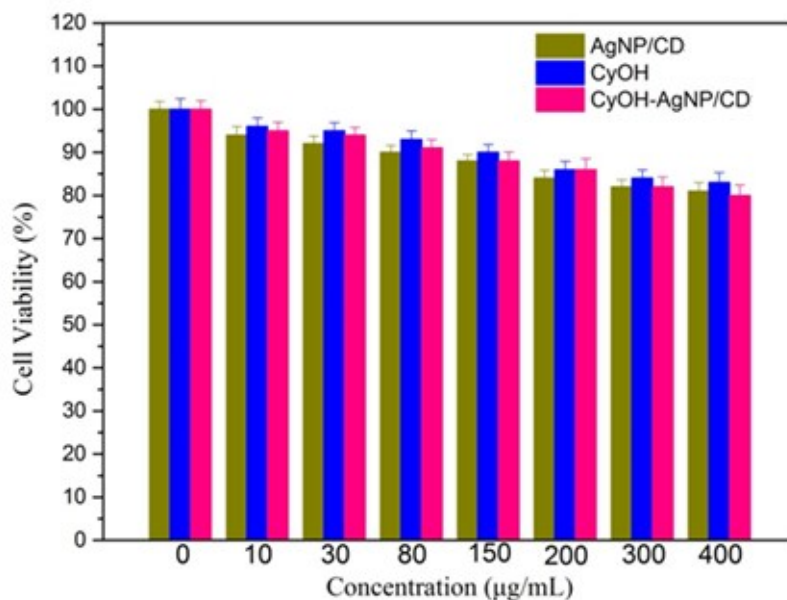

**Figure S8.** Relative viability of 4T1 cell incubated with various concentrations of AgNP/CD, CyOH and CyOH-AgNP/CD.

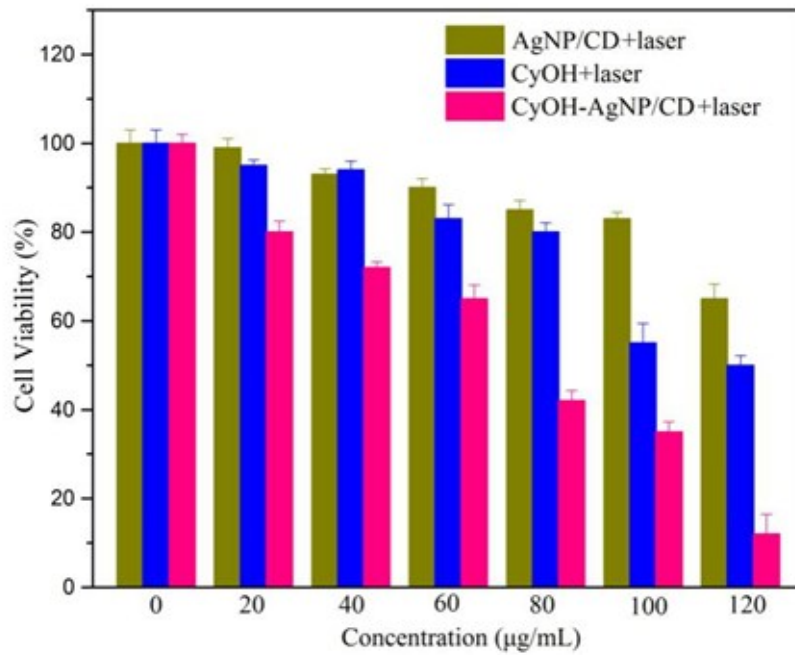

**Figure S9.** Relative viability of 4T1 cell incubated with various concentrations of AgNP/CD, CyOH and CyOH-AgNP/CD with irradiation using a 660 nm laser (50 mW/cm<sup>2</sup>, 5 min).

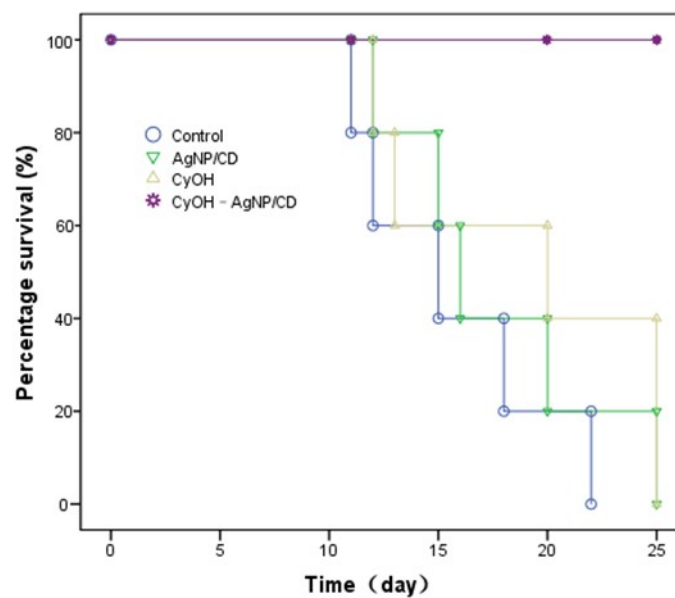

**Figure S10.** Mice survival curves during the treatment of Control, AgNP/CD, CyOH and CyOH-AgNP/CD groups.



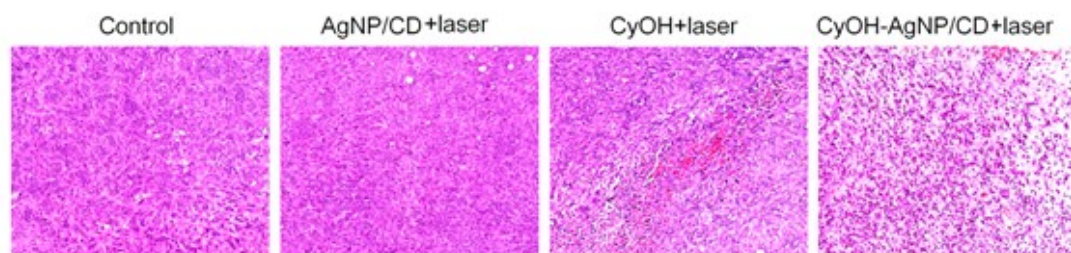

**Figure S11.** H&E-stained images of tumor tissues from sacrificed mice in the four groups after treatment for 20 days.

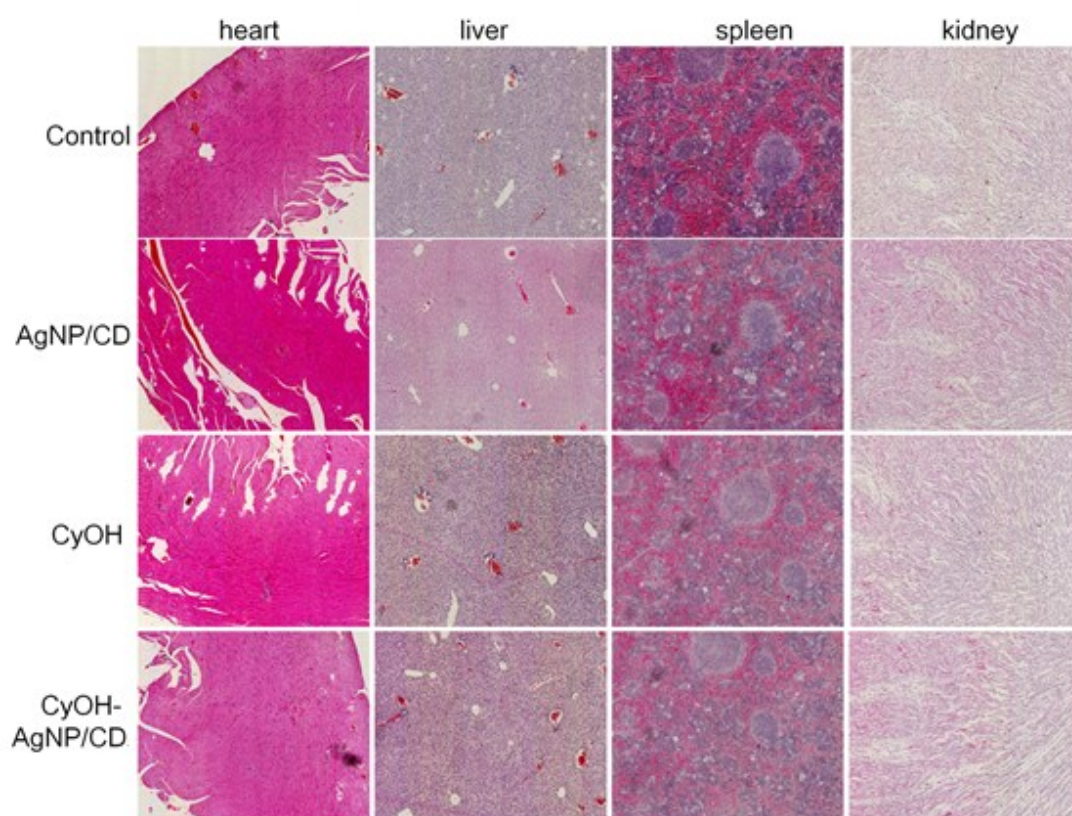

**Figure S12.** H&E-stained images of tissue slides for main organs (heart, liver, spleen and kidney) from sacrificed mice in the four groups after treatment for 20 days.

**Table S1.** Triplet and singlet excitation energy of ligand and Ag-ligand calculated by TD-DFT at the B3LYP/6-31G level.

|           | State | E(eV)  | $\Delta E_{ST}$ (eV) |
|-----------|-------|--------|----------------------|
| Ligand    | S1    | 2.1883 | 1.0022               |
|           | S2    | 2.6441 |                      |
|           | T1    | 1.1861 |                      |
|           | T2    | 2.1529 |                      |
| Ag-Ligand | S1    | 0.9724 | 0.0429               |
|           | S2    | 1.7087 |                      |
|           | T1    | 0.9295 |                      |
|           | T2    | 1.1960 |                      |
